# Supplementary material
Source: PubMed Central journal article supplement (PMC5468465)
Supplement: 14_57_1.pdf [file 14_57_1.pdf]

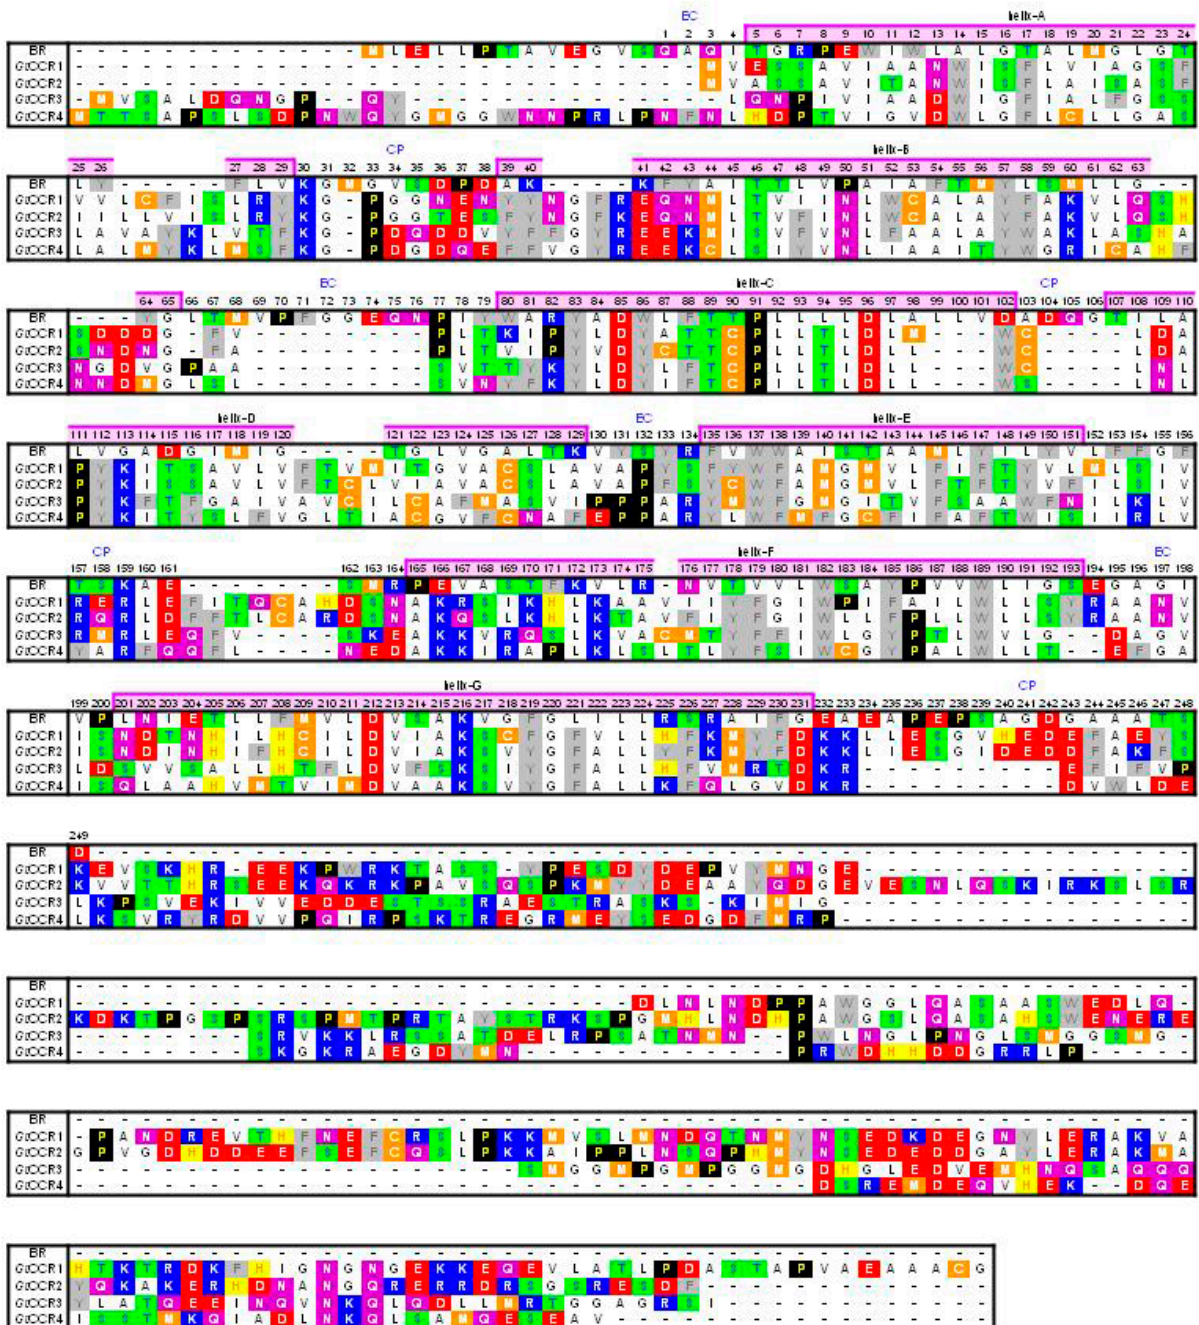

**Supplementary Figure S1.** Amino acid sequences of BR, *GtCCR1*, *GtCCR2*, *GtCCR3*, and *GtCCR4*. The numbering scheme corresponds to the position in BR.

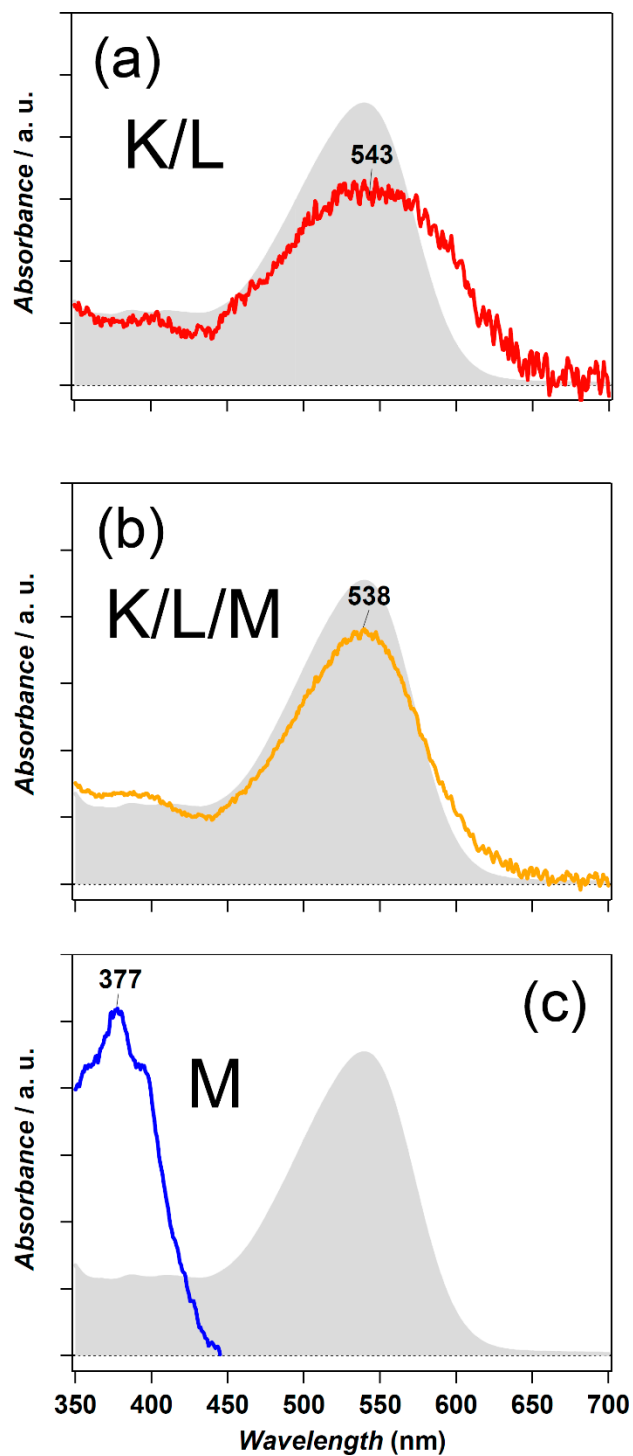

**Supplementary Figure S2.** Calculated absorption spectra of each intermediate shown in the scheme in Figure 2c.

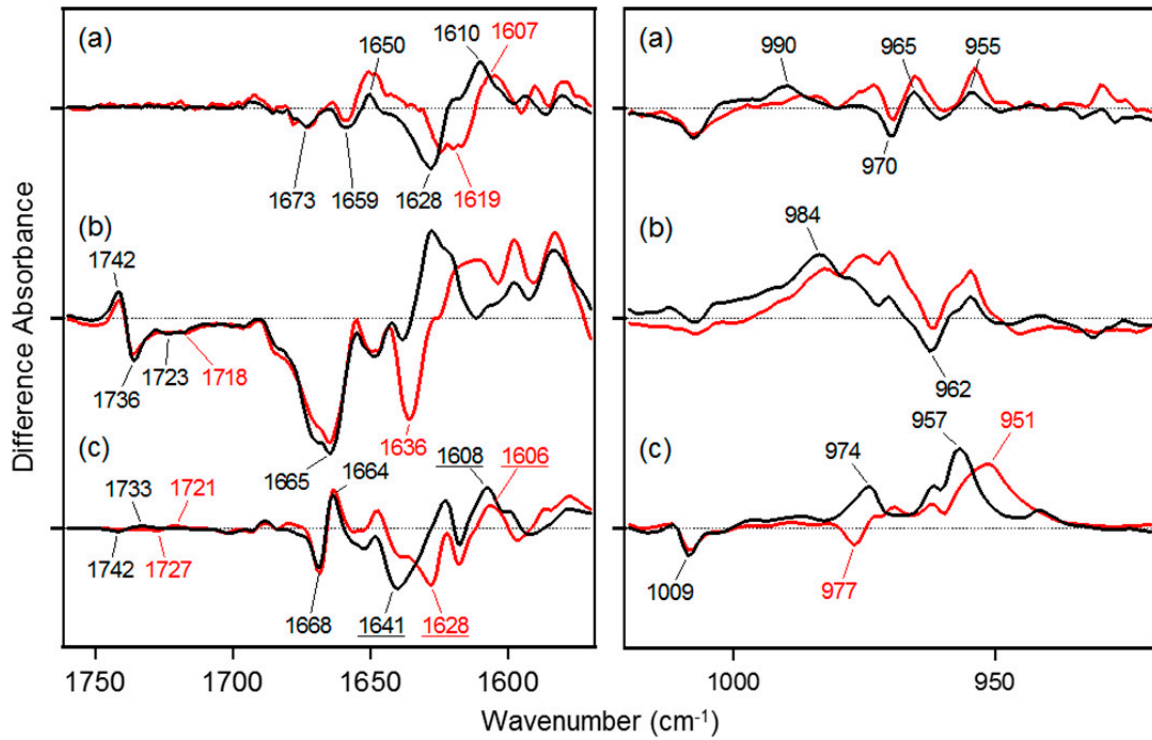

**Supplementary Figure S3.** Difference FTIR spectra of *GtCCR4* (a), *C1C2* (b), and *BR* (c) in the 1760-1570 and 1020-920 cm<sup>-1</sup> region. These figures are enlarged from Figure 4.

|                          |          |          |          |          |          |          |          |          |          |          |          |          |          |          |          |          |          |          |          |          |          |          |          |          |          |          |          |
|--------------------------|----------|----------|----------|----------|----------|----------|----------|----------|----------|----------|----------|----------|----------|----------|----------|----------|----------|----------|----------|----------|----------|----------|----------|----------|----------|----------|----------|
| Residue number of BR     | 20       | 49       | 50       | 53       | 83       | 85       | 86       | 89       | 90       | 93       | 118      | 119      | 122      | 138      | 141      | 142      | 145      | 182      | 185      | 186      | 189      | 208      | 212      | 213      | 215      | 216      | 217      |
| Residue number of GtCCR4 | 46       | 83       | 84       | 87       | 114      | 116      | 117      | 120      | 121      | 124      | 142      | 143      | 150      | 166      | 169      | 170      | 173      | 214      | 217      | 218      | 221      | 238      | 242      | 243      | 245      | 246      | 247      |
| Residue number of C1C2   | 98       | 125      | 126      | 129      | 160      | 162      | 163      | 166      | 167      | 170      | 198      | 199      | 202      | 217      | 220      | 221      | 224      | 262      | 265      | 266      | 269      | 288      | 292      | 293      | 295      | 296      | 297      |
| <b>BR</b>                | <b>M</b> | <b>V</b> | <b>P</b> | <b>A</b> | <b>Y</b> | <b>D</b> | <b>W</b> | <b>T</b> | <b>T</b> | <b>L</b> | <b>M</b> | <b>I</b> | <b>G</b> | <b>W</b> | <b>S</b> | <b>T</b> | <b>M</b> | <b>W</b> | <b>Y</b> | <b>P</b> | <b>W</b> | <b>F</b> | <b>D</b> | <b>V</b> | <b>A</b> | <b>K</b> | <b>V</b> |
| <b>GtCCR4</b>            | <b>L</b> | <b>V</b> | <b>N</b> | <b>A</b> | <b>Y</b> | <b>D</b> | <b>Y</b> | <b>T</b> | <b>C</b> | <b>L</b> | <b>L</b> | <b>F</b> | <b>C</b> | <b>F</b> | <b>G</b> | <b>C</b> | <b>F</b> | <b>W</b> | <b>Y</b> | <b>P</b> | <b>W</b> | <b>T</b> | <b>D</b> | <b>V</b> | <b>A</b> | <b>K</b> | <b>S</b> |
| <b>C1C2</b>              | <b>T</b> | <b>V</b> | <b>A</b> | <b>E</b> | <b>Y</b> | <b>E</b> | <b>W</b> | <b>T</b> | <b>C</b> | <b>I</b> | <b>T</b> | <b>I</b> | <b>G</b> | <b>F</b> | <b>G</b> | <b>L</b> | <b>G</b> | <b>W</b> | <b>F</b> | <b>P</b> | <b>F</b> | <b>H</b> | <b>D</b> | <b>L</b> | <b>S</b> | <b>K</b> | <b>N</b> |

**Supplementary Figure S4.** Twenty seven residues within 5 Å from the chromophore in the structure of BR, and the corresponding residues in *GtCCR4* and C1C2.
